## **Accuracy of a battery-powered portable capnometer in neonates**

Eiji Hirakawa<sup>1,2\*</sup>, Satoshi Ibara<sup>2</sup>

<sup>1</sup> Department of Neonatology, Nagasaki Harbor Medical Center, Nagasaki, Japan

<sup>2</sup>Department of Neonatology, Kagoshima City Hospital, Kagoshima, Japan

\*Corresponding author

E-mail: [hirakawaeiji@gmail.com](mailto:hirakawaeiji@gmail.com)

Short running title: Accuracy of a portable capnometer in neonates

Keywords: end tidal CO<sub>2</sub>, capnometer, premature neonates

## Abstract

End-tidal CO<sub>2</sub> measurement (EtCO<sub>2</sub>) is useful for confirmation of successful tracheal intubation and ensuring adequate ventilation. There are two types of EtCO<sub>2</sub> detector, i.e., single-use-only devices and capnometers. Although portable capnometers are widely used for resuscitation, there have been no reports regarding their clinical utility in neonates. Here, the correspondence between EtCO<sub>2</sub> level determined using a battery-powered portable capnometer and arterial CO<sub>2</sub> (PaCO<sub>2</sub>) was investigated using paired data obtained simultaneously from 26 neonates weighing  $1262 \pm 589$  g at examination on mechanical ventilation. EtCO<sub>2</sub> level and PaCO<sub>2</sub> showed a strong correlation ( $r = 0.839$ ,  $P < 0.001$ ), and the correlation equation was:  $\text{EtCO}_2 = 0.8 \times \text{PaCO}_2 + 1.1$ . Therefore, EtCO<sub>2</sub> readings obtained with a battery-powered portable capnometer were likely to be underestimated. This became more pronounced with decreasing infant body weight at examination as the net difference in measurements of PaCO<sub>2</sub> and EtCO<sub>2</sub> was significantly positively correlated with infant body weight at examination ( $r = 0.451$ ,  $P < 0.001$ ). The observations presented here may be helpful in the use of battery-powered portable capnometers in neonates requiring controlled ventilation with tracheal intubation.

## Introduction

Measurement of carbon dioxide (CO<sub>2</sub>) using a CO<sub>2</sub> detector is a useful method for confirming airway clearance [1]. However, the results obtained using a nasal CO<sub>2</sub> detector are qualitative rather than quantitative. It is important to control CO<sub>2</sub> in premature infants, especially during the acute phase, such as resuscitation, during transportation from the delivery room to the neonatal intensive care unit (NICU). As patients are on a ventilator in the NICU, the initial inspiratory pressure and respiratory rate are set automatically. However, during transportation after birth or resuscitation, ventilation is manually supported. The neonatal resuscitation program (NRP) currently doesn't mention about monitoring CO<sub>2</sub> due to lack of data at resuscitation, and continuous monitoring of EtCO<sub>2</sub> during resuscitation of asphyxiated term lamb have been reported [2]. It is important to visually continuously confirm the EtCO<sub>2</sub> using a capnometer, which helps the respiratory therapist to determine the appropriate initial settings when switching to a ventilator. The capnometer, which measures CO<sub>2</sub> expired from the lung alveoli as end-tidal CO<sub>2</sub> (EtCO<sub>2</sub>), is generally installed in anesthesia machines and is used to identify early airway incidents and to ensure adequate ventilation in the operating room, out of hospital, and during transport of critically ill patients [3, 4, 5]. However, as conventional capnometer devices are heavy, expensive, and of the built-in type, it is challenging to monitor EtCO<sub>2</sub> in patients at the bedside or outside the hospital [4, 6]. Neonatal

resuscitation is usually conducted in the delivery room or operation room, after which the infant is transported to the NICU. Therefore, there is a need for a portable capnometer that can be used easily at resuscitation or during transportation in emergency, delivery, and operation rooms. The EMMA™ capnograph (EMMA, Masimo, Danderyd, Sweden) is small, light ( $5.2 \times 3.9 \times 3.9$  cm and 59.5 g with batteries), is readily portable, does not require routine calibration before use, can be warmed up in a short time, and can be used for continuous monitoring of EtCO<sub>2</sub> [7]. In addition, this is the only portable capnometer currently available with 1-mL dead space for neonates.

Respiratory function includes oxygenation of blood and expiration of CO<sub>2</sub>. Premature neonates often have difficulties in respiration and require tracheal intubation immediately after birth for controlled ventilation. SpO<sub>2</sub> monitoring is recommended during resuscitation and transportation of neonates with respiratory failure to the NICU [8]. However, SpO<sub>2</sub> monitoring alone without EtCO<sub>2</sub> monitoring is insufficient as SpO<sub>2</sub> is only an indicator of the ratio of combined O<sub>2</sub> to hemoglobin. The SpO<sub>2</sub> monitor provides no information about CO<sub>2</sub> levels and is not useful to estimate respiratory acidosis caused by hypercapnia due to inadequate respiration. In neonates, although hypercapnia has been recognized as permissive hypercapnia to protect the lungs, hypercapnia and subsequent respiratory acidosis, which occur after birth, may exacerbate pulmonary hypertension and make it persistent [9]. On the other hand, hypocapnia is related to brain injury [10]. Hyperventilation with subsequent

hypocapnia was a widely practiced strategy in the past [11]. In the 1980s, hyperventilation was the only method available for the treatment of persistent pulmonary hypertension (PPHN), as inhalation of nitric oxide (NO) and/or extracorporeal membrane oxygenation (ECMO) were not commonly accepted treatment options. However, artificially initiated hypocapnia is now recognized as a major risk factor for intracranial intraventricular hemorrhage (IVH) or periventricular leukomalacia (PVL) [12]. Hypocapnia causes brain vasoconstriction, and thus reduces cerebral blood flow (CBF) [11].

The brain vasculature at watershed areas is particularly underdeveloped and vulnerable to hypoperfusion in premature infants at around 32 weeks of gestation, and PVL can occur in this area. IVH is caused by multiple reasons, one of which is hypocapnia [11, 12, 13]. Severe IVH is related to neurodevelopmental delay, and 48% of cases of IVH are observed within the first 6 hours of life.

Therefore, strict control of blood CO<sub>2</sub> levels in the acute phase is required [13, 14].

A portable device to monitor EtCO<sub>2</sub> is expected to facilitate continuous monitoring of blood CO<sub>2</sub> levels during neonatal resuscitation and/or transportation to the NICU. To our knowledge, however, there have been no studies focusing on the accuracy of the EMMA capnograph in neonates. This study was performed to assess the accuracy of the EMMA capnograph in neonates on mechanical ventilation by comparing ETCO<sub>2</sub> measured using this device with arterial carbon dioxide (PaCO<sub>2</sub>) level.

## Materials and Methods

This study was approved by the institutional review board (IRB) of Kagoshima City Hospital (KCH) (20150903). Neonates admitted to the NICU of KCH between July 2014 and February 2015 and requiring controlled ventilation were eligible for inclusion in the study. The parents of all patients provided written informed consent before participation in this study. Two mainstream capnographs are used for patients on mechanical ventilation in KCH, EMMA and CapONE™ (Nihon Kohden, Tokyo). Sidestream capnography is not used. The EMMA was placed proximal to the endotracheal tube using a neonatal adaptor with 1.0-mL dead space. PaCO<sub>2</sub> levels were measured using 100-μL arterial blood sample, and EtCO<sub>2</sub> levels were recorded at the same time as sampling as a number without a decimal point. Each participant underwent EtCO<sub>2</sub> measurement at least once a day. Participants on mechanical ventilation required repeated EtCO<sub>2</sub> measurement during their hospital stay when arterial blood samples were collected. PaCO<sub>2</sub> was measured using an ABL 800™ (Radiometer, Copenhagen, Denmark). All measurements were recorded with the patient in the supine position. Blood gas analysis was performed when ordered by the attending neonatologist depending on the condition of the patient.

Statistical analyses were performed using the JMP13© statistical software package (SAS, Cary, NC).

The Wilcoxon/Kruskal–Wallis method was used for analysis of continuous variables. Fisher’s exact

probability test was used for analysis of categorical variables. Regression analysis was performed. In all analyses,  $P < 0.05$  was considered statistically significant.

## Results

The study population consisted of 26 newborn infants (Table 1). The median (minimum – maximum) gestational age at birth was 27 (22 – 38) weeks and median birth weight was 881 (420 – 2730) g. Tracheal tubes were selected according to birth weight as follows: < 1000 g, Fr. 2.5; 1000 – 1800 g, Fr. 3.0; and > 1800 g, Fr. 3.5. At the point of measurement, the ventilation mode was synchronized intermittent mechanical ventilation (SIMV) without volume guarantee and the leakage displayed on the ventilator was 0% in all patients. Simultaneous EMMA EtCO<sub>2</sub> and PaCO<sub>2</sub> measurements were performed 63 times in the 26 infants (median, three times per infant). Median values of corrected age, body weight, and tidal volume of those measured with EMMA were 30 (22 – 38) weeks of gestation, 1151 (420 – 2730) g, and 5.6 (3.3 – 7.4) mL/kg, respectively (Table 1). No adverse events associated with use of the EMMA capnograph occurred in the 26 infants.

### *Correlation between EtCO<sub>2</sub> and PaCO<sub>2</sub>*

As shown in Fig. 1, the majority of EtCO<sub>2</sub> measurements were lower than those of PaCO<sub>2</sub>. However, the correlation coefficient (r) was 0.839 and the correlation equation was as follows for 63 paired data:  $\text{EtCO}_2 = 0.80 \times \text{PaCO}_2 + 1.17$ . Thus, the overall EtCO<sub>2</sub> measurements were approximately 20% lower than PaCO<sub>2</sub> measurements.

### ***Effects of infant body weight on EtCO<sub>2</sub> measurements***

The body weights of the infants showed no significant correlation with PaCO<sub>2</sub> measurements, but were significantly positively correlated with EtCO<sub>2</sub> measurements (Fig. 2, upper and middle panels). As most EtCO<sub>2</sub> measurements were lower than those of PaCO<sub>2</sub> (Fig. 1), these results suggested that EtCO<sub>2</sub> measurements were more likely to be underestimated in infants with lower body weight. This was the case, as shown in the lower panel of Fig. 2, where net differences between measurements of PaCO<sub>2</sub> and EtCO<sub>2</sub> increased as infant body weight decreased. However, the net differences were not significantly correlated with tidal volume (mL/kg) at the time of examination.



## Discussion

In this study, EtCO<sub>2</sub> measured using an EMMA capnograph in neonates was strongly correlated with PaCO<sub>2</sub>. There have been no previous reports regarding the correlation between EtCO<sub>2</sub> measured using an EMMA capnograph and PaCO<sub>2</sub> in neonates. This is the first report of the application of this device to neonates, including extremely infants with low birth weight. As shown in Fig.1, correlations between EtCO<sub>2</sub> and PaCO<sub>2</sub> were observed over wide ranges; PaCO<sub>2</sub> [24.5 – 84.5] and EtCO<sub>2</sub> [18 – 79]. These observations also showed that the EMMA capnograph correctly followed PaCO<sub>2</sub> over a wide range. However, EtCO<sub>2</sub> was approximately 20% lower than PaCO<sub>2</sub>. The EMMA capnograph underestimated blood levels of CO<sub>2</sub> by 20% compared with PaCO<sub>2</sub>. Singh et al. reported a correlation between PaCO<sub>2</sub> and EtCO<sub>2</sub> following surfactant therapy [15]. Hyaline membrane disease (HMD) is also one possible explanation for the difference [16]. However, no infants with HMD were included in the present study. Our data showed that the net difference was larger in infants with lower birth weight, meaning that a greater tidal volume was required for accuracy of EtCO<sub>2</sub> measurement. EtCO<sub>2</sub> was measured with a sensor set at the proximal end of the tracheal tube, which was also the end of the entire ventilation circuit. Therefore, tidal volume (mL) may affect EtCO<sub>2</sub> depending on the level of flow at the sensor. In management of mechanical ventilation, tidal volume per weight (TV mL/kg) is a score that ensures that the ventilator settings are adequate for the

patient. The normal range of TV mL/kg in neonates is 4 – 6 mL/kg. Obviously, the net tidal volume (mL) is smaller in infants with lower birth weight. In this study, the median body weight and median TV mL/kg at the time of examination were 1151 (420 – 2730) g and 5.6 (3.3 – 7.4) mL/kg, respectively. TV mL/kg was adequate for each body weight. Low tidal volume may have been responsible for the observed net differences between PaCO<sub>2</sub> and EtCO<sub>2</sub>. The differences may also have been due to differences in the sizes of tracheal tubes. Use of a tracheal tube of inadequate size may affect tidal volume, because the tracheal tubes used in neonates do not have a cuff, and therefore tidal volume may be affected by air leakage. However, air leakage displayed on the ventilator monitors was 0% at each examination in this study.

## **Conclusion**

The results of this study indicated that EtCO<sub>2</sub> measured using an EMMA capnograph was positively correlated to PaCO<sub>2</sub> even in preterm neonates. Thus, this device may be applicable even in preterm neonates. As shown in the correlation equation, EtCO<sub>2</sub> determined with the EMMA capnograph was approximately 20% lower than PaCO<sub>2</sub>. Therefore, this underestimation must be taken into account when assessing blood CO<sub>2</sub> level using this device.

## **Author contributions**

E.H., and S.I. contributed to the study design and writing the manuscript.

All authors have seen and approved the final version of this manuscript.

The authors declare no conflict of interest.

**Table 1 Demographic characteristics of the 26 patients**

|                            |                   |
|----------------------------|-------------------|
| Male/Female                | 12 (46%)/14 (54%) |
| Gestational week at birth  | 27 (22 – 38)      |
| 22 – 26                    | 12 (46%)          |
| 27 – 32                    | 9 (35%)           |
| 33-                        | 5 (19%)           |
| Birth weight (g)           | 881 (420 – 2730)  |
| ≤ 999                      | 15 (58%)          |
| 1000 – 1499                | 3 (11%)           |
| 1500 – 2499                | 7 (27%)           |
| ≥ 2500                     | 1(4%)             |
| EMMA application           |                   |
| Total no. of applications  | 63                |
| No. of applications/infant | 3 (1 – 5)         |
| Once                       | 8 (13%)           |
| Twice                      | 5 (16%)           |
| Three times                | 9 (42%)           |

|                             |                        |
|-----------------------------|------------------------|
| Four times                  | 2 (13%)                |
| Five or more                | 2 (16%)                |
| Corrected age (weeks)       | 30 (22 – 38)           |
| Body weight (g)             | 1151 (420 – 2730)      |
| <u>Tidal volume (mL/kg)</u> | <u>5.6 (3.3 – 7.4)</u> |

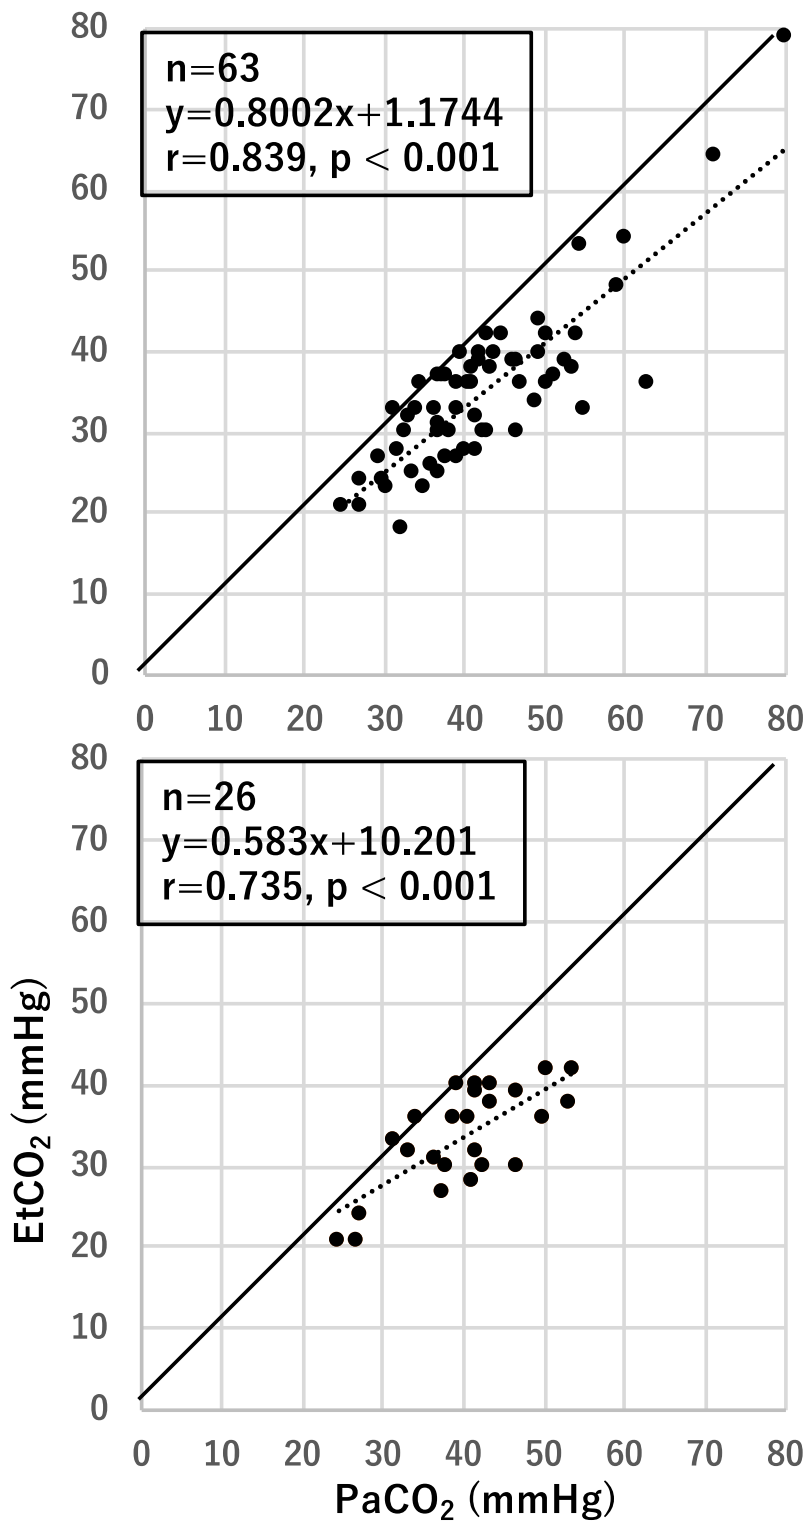

Figure 1. Correlation between PaCO<sub>2</sub> and EtCO<sub>2</sub>

PaCO<sub>2</sub> and EtCO<sub>2</sub> were determined simultaneously 63 times in the 26 infants.

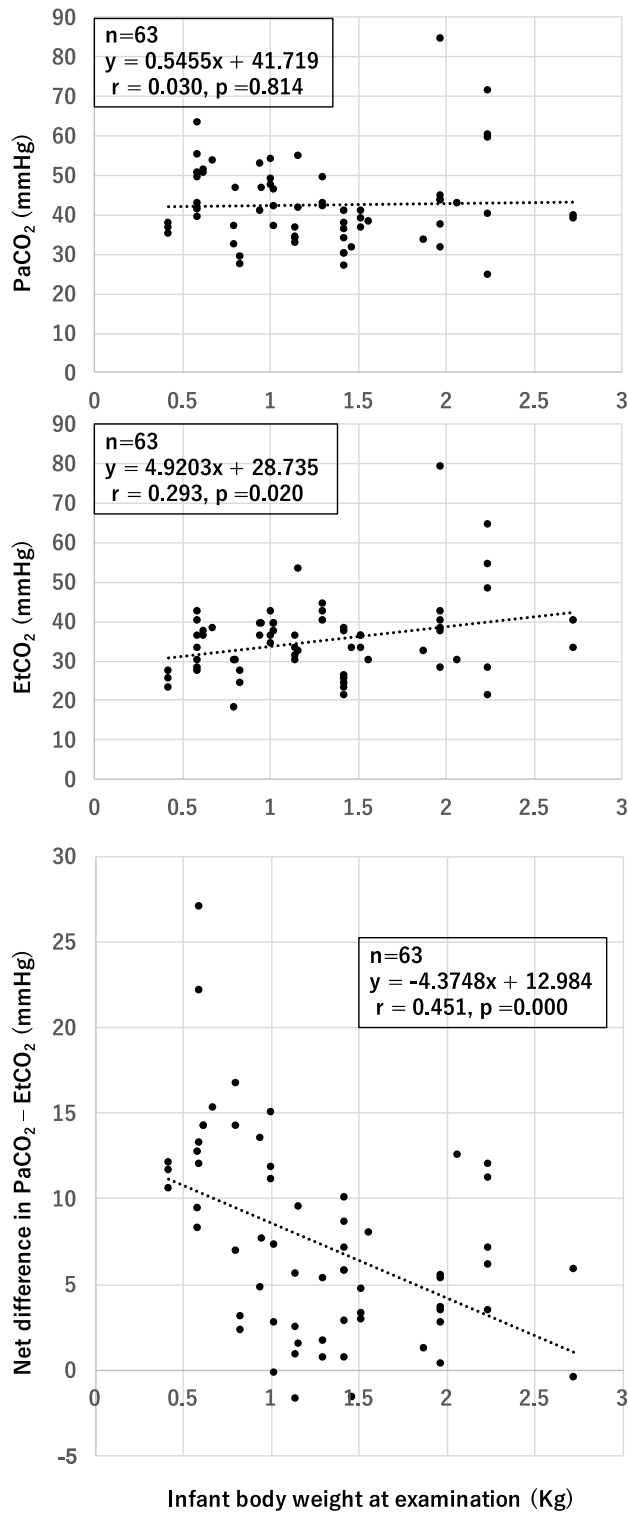

Figure 2. Effects of infant body weight at examination on PaCO<sub>2</sub>, EtCO<sub>2</sub>, and net difference in measurements of PaCO<sub>2</sub> and EtCO<sub>2</sub>

## References

1. Gavin A, Daragh Finn, Mmoloki K, Vicki Livingstone, O'Toole JM, Boylan GB, et al. J Pediatr. 2017;182: 74-78.e2.
2. Praveen Kumar Chandrasekharan , Munmun Rawat, Jayasree Nair, Sylvia F Gugino, Carmon Koenigsnecht, Daniel D Swartz et al. Continuous End-Tidal Carbon Dioxide Monitoring During Resuscitation of Asphyxiated Term Lambs. Neonatology. 2016;109(4):265-73.
3. Georgiou AP, Gouldson S, Amphlett AM. The use of capnography and the availability of airway equipment on Intensive Care Units in the UK and the Republic of Ireland. Anaesthesia 2010;65: 462-467.
4. Levine RL, Wayne MA, Miller CC. End-tidal carbon dioxide and outcome of out-of-hospital cardiac arrest. N Engl J Med 1997;337: 301-306.
5. Sonia Singh, William D, Shekhar T, Mananda S. Utility of a novel quantitative handheld microstream capnometer during transport of critically ill children. Am J Emerg Med. 2006;24: 302-307.
6. Varon AJ, Morrino J, Civetta JM. Clinical utility of a colorimetric end-tidal CO<sub>2</sub> detector in cardiopulmonary resuscitation and emergency intubation. J Clin Monit. 1991;7: 289-293.



7. Heines SJH, Strauch U, Roekaerts PMHJ, Winkens B, Bergmans DCJJ. Accuracy of end-tidal CO<sub>2</sub> capnometers in post-cardiac surgery patients during controlled mechanical ventilation. *J Emerg Med.* 2013;45: 130-135.
8. Finn D, Boylan GB, Ryan CA, Dempsey EM. Enhanced monitoring of the preterm infant during stabilization in the delivery room. *Front Pediatr.* 2016;4: 30.
9. Noori S, Anderson M, Soleymani S, Seri I. Effect of carbon dioxide on cerebral blood flow velocity in preterm infants during postnatal transition. *Acta Paediatr.* 2014;103: e334-e339.
10. Zhou W, Liu W. Hypercapnia and hypocapnea in neonates. *World J Pediatr.* 2008;4: 192-196.
11. Laffey JG, Kavanagh BP. Hypocapnia. *N Engl J Med.* 2002;347: 43-53.
12. Curley G, Kavanagh BP, Laffey JG. Hypocapnia and the injured brain: More harm than benefit. *Crit Care Med.* 2010;38: 1348-1359.
13. Ballabh P. Intraventricular hemorrhage in premature infants: mechanism of disease. *Pediatr Res.* 2010;67: 1-8.

14. Al-Abdi SY, Al-Aamri MA. A systematic review and meta-analysis of the timing of early intraventricular hemorrhage in preterm neonates: clinical and research implications. *J Clin Neonatol.* 2014;3: 76-88.
15. Singh BS, Gilbert U, Singh S, Govindaswami B. Sidestream microstream end tidal carbon dioxide measurements and blood gas correlations in neonatal intensive care unit. *Pediatr Pulmonol.* 2013;48: 250-256.
16. Bhat Y R, Abhishek N. Mainstream end-tidal carbon dioxide monitoring in ventilated neonates. *Singapore Medi* 2008;49(3): 199-203.
